Williams *et al.* Impact of streetlight technologies on bats

1     **Differential effects of emerging broad-spectrum streetlight technologies on**  
2                                     **landscape-scale bat activity**

3  
4  
5     Rowland Williams<sup>1,\*</sup>, Charlotte Walters<sup>1</sup>, Rory Gibb<sup>1</sup>, Ella Browning<sup>1,2</sup>, David Tipping<sup>3</sup> and  
6     Kate E. Jones<sup>1,2,\*</sup>

7  
8     <sup>1</sup>Centre for Biodiversity and Environment Research, Department of Genetics, Evolution and  
9     Environment, University College London, Gower Street, London, WC1E 6BT, United  
10    Kingdom.

11   <sup>2</sup>Institute of Zoology, Zoological Society of London, Regent's Park, London, NW1 4RY,  
12   United Kingdom.

13   <sup>3</sup>Department of the Environment, States of Jersey, Howard Davis Farm, La Route de la  
14   Trinité, Trinity, JE3 5JP, Jersey, Channel Islands.

15

16

17   \*Corresponding authors: Rowland Williams ([rowland.williams.13@ucl.ac.uk](mailto:rowland.williams.13@ucl.ac.uk)); Kate E. Jones  
18   ([kate.e.jones@ucl.ac.uk](mailto:kate.e.jones@ucl.ac.uk))

19

20   Word count: 6683, Summary – 289, Main text – 4351, Acknowledgments – 52, References –  
21   1189, Tables and figure legends – 636, Number of tables: 2, Number of figures: 4, Number of  
22   references: 47.

23

Williams *et al.* Impact of streetlight technologies on bats

24 **Summary**

25 Urbanization has greatly reduced the extent of high quality habitat available to wildlife with  
26 detrimental consequences documented across a range of taxa. Roads and artificial lighting  
27 regimes are dominant features of the modern environment, and there is currently a rapid  
28 worldwide transition towards energy-efficient, broad-spectrum white-light streetlight  
29 technologies such as metal halide (MH) and more recently, light-emitting diode (LED),  
30 despite little being known about their broad ecological impacts. Here, in a five-year citizen  
31 science study across the island of Jersey, we combine detailed lighting and habitat data with  
32 ultrasonic bat survey data collected from 2011 to 2015 (before and after a LED lighting  
33 technology transition), to analyse the landscape-scale effects of different broad-spectrum  
34 streetlight technologies on activity of a widespread, generalist bat species. In contrast to  
35 many experimental studies, we show that the local density of both traditional yellow high-  
36 pressure sodium (HPS) and more modern LED streetlights have significant negative effects  
37 on activity of the common pipistrelle (*Pipistrellus pipistrellus*) compared to unlit areas, while  
38 accounting for spatial bias, bat population trends over time, surrounding habitat type and  
39 road-type. In contrast, we find no discernable impact of the density of ultra-violet emitting  
40 MH lighting on bat activity. This is the first large-scale evidence that emerging artificial  
41 lighting technologies have differential impacts on activity, even for a bat species generally  
42 characterised as light-tolerant and commonly found in urban areas. Importantly, our  
43 landscape-level approach also demonstrates that the degree of urbanization and road type  
44 have even larger negative impacts on bat activity, independent of artificial lighting regime.  
45 Our findings emphasise the need for improving landscape-scale understanding of the  
46 ecological impacts of new lighting technologies prior to widespread uptake, and have  
47 important implications for future streetlight installation programmes and urban planning  
48 more generally.

Williams *et al.* Impact of streetlight technologies on bats

49 **Key words:** bats, acoustic monitoring, artificial lighting, citizen science, island, roads, States  
50 of Jersey, urbanisation.

Williams *et al.* Impact of streetlight technologies on bats

51 **Introduction**

52 Global biodiversity is declining at unprecedented rates in response to anthropogenic pressures  
53 (1). Urbanization has greatly reduced the extent of high quality habitat available to  
54 biodiversity (2), and roads in particular have caused widespread fragmentation of landscapes  
55 (3), creating barriers to animal movement, severing commuting routes and restricting access  
56 to foraging sites (4). A key feature of modern road environments is artificial light at night  
57 (ALAN). ALAN levels are increasing rapidly; from 2012 to 2016, the global artificially lit  
58 outdoor area increased by 2.2% per year (5). ALAN is considered an emerging threat to  
59 biodiversity, as detrimental effects have been documented in a range of taxa. For example,  
60 ALAN may disrupt networks of nocturnal pollinators which could have consequences for the  
61 provision of important ecosystem services (6). Even low levels of artificial light may be  
62 capable of causing significant phenological shifts, such as early onset of reproduction in  
63 songbirds (7). Artificial lighting regimes may therefore exacerbate the barrier effects of roads  
64 on wildlife by increasing energetic costs and reducing long-term fitness (8).

65 Bats (order Chiroptera) are of conservation importance as almost one quarter of  
66 species are threatened globally (9). Bats provide key ecosystem services and are considered  
67 an effective bio-indicator across a range of spatial scales (10). Bats are vulnerable to the  
68 fragmenting effects of roads as their home range sizes tend to be larger than would be  
69 predicted from body size (11,12). The nocturnal activity patterns of bats make them sensitive  
70 to ALAN, and clutter-adapted genera such as *Myotis* and *Rhinolophus* are known to be  
71 particularly light-averse. Lighting may force bats to use inferior commuting routes, which  
72 may increase energetic costs and predation risk (13). However, fast-flying bat species adapted  
73 to foraging in open areas may be relatively light-tolerant and could benefit from aggregations  
74 of insect prey around streetlights. Indeed, *Pipistrellus*, *Nyctalus* and *Eptesicus* bat species  
75 have all been observed foraging on insects at streetlights (14–16). However, by creating a

Williams *et al.* Impact of streetlight technologies on bats

76 ‘vacuum effect’, whereby insect biomass is attracted away from unlit areas, artificial lighting  
77 may reduce food availability for light-averse species (17). The presence of streetlights in  
78 urban or semi-urban landscapes therefore has the potential to alter the composition of bat  
79 assemblages and exacerbate the detrimental impacts of roads on bat ecology (18).

80 Traditional methods of road illumination involve orange low pressure sodium (LPS)  
81 and yellow high pressure sodium (HPS) lamps (19). Recently, there have been widespread  
82 transitions toward white-light technologies such as metal halide (MH) and energy-efficient  
83 light emitting diode (LED) to reduce operating costs and carbon emissions (20). The  
84 ecological consequences of such changes remain unclear. The four technologies can be  
85 divided into three categories reflecting spectral composition: non-ultraviolet (UV) emitting  
86 narrow spectrum (LPS), non-UV emitting broad spectrum (HPS and LED) and UV emitting  
87 broad spectrum (MH) (Table 1) (19). Experimental evidence suggests that the effects of  
88 different streetlight technologies on bat behaviour may be dependent on ultraviolet (UV)  
89 content (18). In general, bat activity for more light-tolerant species is positively associated  
90 with UV content, probably due to increased attraction of insect prey (17,21).

91 Given the interspecific variation in light-tolerance among bats, the effects of different  
92 lighting technologies are also likely to be species-specific. For example, experimental  
93 illumination of hedgerows with HPS and LED lights led to a significant reduction in  
94 *Rhinolophus hipposideros* activity but had no effect on *Pipistrellus* sp. activity (8,22).  
95 However, other work at larger spatial scales has shown that *Pipistrellus* activity is reduced in  
96 road sections lit with HPS lights (23), suggesting that the observed effects of different light  
97 types may be dependent on the spatial scale at which analyses are conducted. Although at the  
98 landscape scale there appears to be a broadly negative relationship between ALAN and bat  
99 activity (24), the relative effects of different forms of artificial lighting on bat ecology are  
100 unknown. Given the current global transition towards white light technologies (21), improved

Williams *et al.* Impact of streetlight technologies on bats

101 understanding of their impacts is vital to inform effective road mitigation and bat  
102 conservation.

103 Here, we collect acoustic data from roadside transects across the island of Jersey, as  
104 part of the Indicator Bats Programme (iBats), a citizen science bat population monitoring  
105 scheme (25,26). Using activity data for the common pipistrelle bat, *Pipistrellus pipistrellus*  
106 and streetlight data from 2011 to 2015, a period spanning the recent transition from older  
107 HPS lights to higher-efficiency LED lights across parts of the island, we analyse the  
108 landscape effects of three broad-spectrum streetlight technologies HPS, MH and LED on bat  
109 activity, accounting for spatial bias, time (multi-year bat population trends), habitat  
110 heterogeneity, climate and road type. We focus on *P.pipistrellus* because roadside acoustic  
111 monitoring is biased towards this fast-flying species and, although generally considered to be  
112 tolerant of lighting and often found in urban areas, it remains unclear whether ALAN regimes  
113 have large-scale effects on this species' behaviour and ecology (26). Considering this, and the  
114 link between UV content and bat activity around streetlights, we expected *Pipistrellus*  
115 *pipistrellus* activity to be lower along roads lit with non-UV emitting HPS and LED lights  
116 than those lit with UV emitting MH lights. We also investigate the relative impact of habitat  
117 and environmental drivers on bat activity and predict landscape suitability at an island-wide  
118 scale.

119

## 120 **Results**

121 During roadside surveys across Jersey from 2011 to 2015, we recorded 2974 bat passes  
122 (discrete sequences of calls emitted by an individual) from ten different bat species or species  
123 groups, with the most abundant species being the common pipistrelle (*P. pipistrellus*) and  
124 least abundant, *Myotis* species (Figures 1b & 2, Supplementary Information Table S2).  
125 Records of juvenile *P. kuhlii* have been recently identified on Jersey, making this likely to be

Williams *et al.* Impact of streetlight technologies on bats

126 a resident species (pers comm. David Tipping 2015), rather than a misclassification of other  
127 resident pipistrelle species. We modelled the relationship between *P. pipistrellus* activity and  
128 density of street-lighting across sampled 50m<sup>2</sup> grid-cells using Poisson generalised linear  
129 mixed-effects regression, controlling for space, time (multi-year bat population trends),  
130 habitat heterogeneity, climate and road type, with model averaging carried out in an  
131 information-theoretic framework (see Materials & Methods). Both the local density of HPS  
132 and LED lights had a significant and similar negative effect on *P. pipistrellus* activity, whilst  
133 the effect of MH density was neutral and insignificant (confidence interval includes zero and  
134 cumulative AICc weight (W) is low (<0.4)) (Table 2, Figure 3). The percentage cover of  
135 woodland and water had a significant positive effect on *P. pipistrellus* activity whilst urban  
136 percentage cover had a significant negative effect (Figure 3). Since all habitat and lighting  
137 variables were centred and scaled prior to modelling, our results show that the relative effect  
138 of urban cover on bat activity was stronger than all lighting technologies tested (Figure 3).  
139 The percentage cover of arable land and grassland around roads were not informative  
140 predictors of *P. pipistrellus* activity, as the confidence intervals of these estimates included  
141 zero and their cumulative AICc weights were low (<0.6 and <0.4, respectively) (27). Bat  
142 activity was also related to the type of road from which bat passes were detected, with the  
143 one major road in Jersey having the strongest significant negative impact on *P. pipistrellus*  
144 activity followed by main roads (Table 2). Temperature had no significant effect on  
145 *P. pipistrellus* activity whereas wind speed had a significant positive effect (Table 2). The  
146 spatial autocovariate (see Materials & Methods) was an important predictor variable  
147 (cumulative AICc weight of 1) in the average model, and inclusion of the autocovariate in the  
148 global model also noticeably improved model fit in terms of AIC, indicating that there was  
149 significant autocorrelation in the spatial distribution of sampled bat activity across Jersey.

Williams *et al.* Impact of streetlight technologies on bats

150 Our results were also robust to conducting the same analyses at a different spatial scale  
151 (100x100m grid cells; Table S4).

152

153 **Discussion**

154 *i) Landscape effects of different broad spectrum lighting technologies*

155 Our results reveal differences in the relative impacts of three different broad-spectrum  
156 streetlight technologies on the activity of a bat species, *P.pipistrellus*, that is often found in  
157 urban habitats and generally considered to be resilient to human disturbance (8). Whilst MH  
158 density had little impact on this species' activity, the two non-UV emitting technologies LED  
159 and HPS had a significant and negative impact on activity, across multiple years of  
160 monitoring at a large (island-wide) spatial scale.

161 Previous studies found that experimental illumination of hedgerows with HPS and  
162 LED streetlights had no significant effect on *P. pipistrellus* activity (8,22). However, these  
163 were short and small in scale, and our findings for HPS density are supported by recent  
164 evidence from Ireland of lower *Pipistrellus* activity in road sections lit using HPS lights (23).  
165 Our study is the first to reveal a similarly negative interaction between LED lighting and  
166 landscape-scale *P. pipistrellus* activity, again despite previous experimental studies having  
167 suggested otherwise (and despite this species typically being characterised as light-tolerant).  
168 These apparent contradictions between experimental results and our larger-scale findings  
169 suggest that the spatiotemporal scale of analyses may substantially influence our ability to  
170 reliably detect the effects of artificial lighting on populations. This highlights the importance  
171 of conducting future studies at spatial scales that are most relevant to detecting population-  
172 level effects. We also advise caution around use of the term 'light-tolerant' in bat-lighting  
173 research, as our results alongside others (18,23) suggest that artificial lighting has the  
174 potential to detrimentally affect the ecology of many apparently light-tolerant species.



Williams *et al.* Impact of streetlight technologies on bats

175           The differences in the average regression coefficients observed between the three  
176 light types may be related to UV content. Relative to MH lights, fewer insects should be  
177 attracted to HPS and LED lights, since these do not emit UV (19). A recent experimental  
178 study showed that significantly higher numbers of insects were attracted to MH light than to  
179 HPS and LED, which both attracted similar numbers of insects (28). There is also  
180 experimental evidence linking bat activity to streetlight UV content, for example significant  
181 decreases in *Pipistrellus* and *Nyctalus/Eptesicus sp.* activity after replacing high-UV with  
182 low-UV light (18,21). As such, the negative relationship we observe between HPS/LED  
183 density and *P.pipistrellus* activity may result from a combination of limited feeding  
184 opportunities and local increases in light-dependent predation risk around artificial lights  
185 (23,29). Conversely, increased predation risk around MH lights could be offset by local  
186 increases in foraging success, which may explain the relatively neutral relationship between  
187 MH density and *P.pipistrellus* activity.

188           Unlike previous experimental analyses, our study examined the effects of lights that  
189 bats will have become habituated to. We also accounted for temporal transitions from yellow  
190 HPS to white LED lights that occurred in certain parts of the study area from 2014 onward.  
191 However, the exact dates when each HPS light was replaced with an LED were unavailable,  
192 and it is possible that LEDs were not installed in certain areas until 2015 or later, which could  
193 confound the parameter estimates for these lighting types. Thus, care in interpreting our  
194 results concerning the effect of LED lights should be taken, but these estimates seem intuitive  
195 considering the well-established link between UV content and bat behavior.

196           By modelling key environmental and road-type variables alongside lighting densities,  
197 we were also able to control for habitat heterogeneity, degree of urbanisation, road-type and  
198 weather, all of which had noticeable effects on patterns of bat activity. In particular, intact  
199 woodland and aquatic habitats were consistently the strongest positive predictors of *P.*

Williams *et al.* Impact of streetlight technologies on bats

200 *Pipistrellus* activity around roads, which are in accordance with other studies of bat space  
201 use, and likely relate to higher insect abundances in these habitat types (30,31). Roads act as  
202 barriers to bat movement (4), so efforts to improve permeability by improving roadside  
203 habitat are a priority in bat conservation; our results suggest that, as well as preserving  
204 woodland and wetland habitat, it is crucially important that artificial lighting regimes are,  
205 wherever possible, excluded from areas of critical habitat (Figure 4).

206

207 *ii) Future recommendations*

208 Considering our findings that the two emerging technologies LED and MH have different  
209 effects on *P. pipistrellus* activity at an island-wide scale, we suggest that which of these light-  
210 types is chosen to replace end of life HPS lights could differentially impact the diversity and  
211 species composition of bat communities. Conversion of existing HPS lights to MH lights may  
212 provide generalist species such as *P. pipistrellus* with increased foraging success in lit  
213 environments. However, the high UV content of MH lights could lead to detrimental  
214 community level effects by increasing the ‘vacuum effect’ (28) and hence reducing food  
215 availability for genera such as *Plecotus* and *Rhinolophus* which tend to be excluded from  
216 illuminated areas (8,16,22). There is some evidence for lighting regimes causing such  
217 ecological displacements. For example, declines in *Rhinolophus hipposideros* populations in  
218 Switzerland may have been a result of competitive exclusion by *P. pipistrellus* (32).  
219 Increased attraction of bats to MH lights could also exacerbate the effect of roads on bats by  
220 increasing the chance of vehicular collision. We therefore advise against the use of high UV  
221 content streetlights such as MH where possible, due to their potential to cause far-reaching  
222 ecological disturbance.

223 In the coming years, the States of Jersey plan to replace all streetlights with LED  
224 bulbs (Jersey Electricity Company pers. comm.). Considering the similarity in model

Williams *et al.* Impact of streetlight technologies on bats

225 estimates for HPS and LED lighting and their abilities to attract insects (28), conversion of  
226 existing HPS lights to LEDs may not noticeably affect bat communities. However, such a  
227 transition would involve a subtle change in light colour from yellow (HPS) to white (LED).  
228 Experimental research using lamps which emitted negligible amounts of UV showed that *P.*  
229 *pipistrellus* activity was significantly higher around white light than red light and no light  
230 (33). However, further research is needed into how changing light colour from yellow to  
231 white whilst holding UV content constant may impact upon bat behaviour. Recent  
232 experimental evidence showed that activity of *Myotis spp.* (a light-averse genus) increased  
233 significantly when high UV mercury vapour lights were converted to LED lights, whilst  
234 activity of *P. pipistrellus* was significantly reduced. Thus, it was suggested that LED lights  
235 could potentially benefit light-averse species by reducing the barrier effects of high UV  
236 lighting and by reducing any potential competitive advantage of light-tolerant species (18).  
237 Despite the negative effect of LED observed here on *P. pipistrellus*, proposed replacement of  
238 old lamps with LEDs could potentially reduce long-term anthropogenic disturbance to bat  
239 communities by minimizing the disparity between the effects of artificial lighting on  
240 generalist species (such as *P. pipistrellus*) and on those that are more obviously light-averse  
241 (such as *Myotis spp.*).

242 Installation of lighting regimes along roads has the potential to exacerbate their  
243 barrier effects and create vacuum effects for insect biomass. Thus, it is important that lights  
244 are only installed in key areas, away from areas of critical habitat (Figure 4). Whilst such an  
245 approach should be implemented where possible, we also recognize the role that artificial  
246 lighting regimes may play in increasing the safety of roads. Advances in streetlight  
247 technologies mean that there are now numerous possible solutions to minimize ecological  
248 impact. For example, directed lighting and motion sensors could be used to restrict  
249 unnecessary light usage. The UV content of streetlight technologies is also non-functional for

Williams *et al.* Impact of streetlight technologies on bats

250 humans, so removal of UV wavelengths could have far-reaching ecological benefits without  
251 compromising performance (23). Due to the inherent taxonomic biases in road-based acoustic  
252 surveys, we were unable to examine the effect of each streetlight technology on species with  
253 a greater light intolerance. Given that road artificial lighting regimes are increasing and  
254 energy efficient technologies such as LED are increasing in popularity, this should also  
255 become a research priority. Nonetheless, our results stress that artificial lighting regimes have  
256 complex landscape-scale effects on bat ecology and distributions, even for species broadly  
257 considered to be human-tolerant. Our study also adds to a growing body of evidence showing  
258 the impressive ability of citizen science data to reliably detect global change effects on  
259 species ecology, such as the negative impacts of artificial light. Innovative citizen science  
260 programmes will likely play an increasingly important role in long-term monitoring of  
261 biodiversity.

262

263 **Material and Methods**

264 *(i) Bat acoustic activity data*

265 Bat echolocation calls were collected as part of the Indicator Bats (iBats) Programme  
266 conducted on the island of Jersey (49.2144° N, 2.1312° W) (Figure 1). Ultrasonic recordings  
267 were made along 11 transect routes of approximately 25 km, repeated twice (and  
268 occasionally three times) in July and August of each year from 2011-2015, using full-  
269 spectrum time-expansion (TE) acoustic devices (Tranquility Transect, Courtplan Design Ltd,  
270 UK), following the methods in (26) (see Supplementary Information Methods for detailed  
271 data collection protocols). Each single survey event is henceforth referred to as a '*recording*  
272 *event*'. Transects were driven at 25 km/hr starting 30-45 minutes after sunset, and a GPS  
273 track was simultaneously recorded along the transect route to enable geo-referencing of  
274 recorded calls. At the beginning of each recording event, data on temperature (° C) and wind

Williams *et al.* Impact of streetlight technologies on bats

275 speed (calm, light or breezy) were recorded (surveys were not conducted in high winds).  
276 Acoustic devices were set to record using a TE factor of 10, a sampling time of 320ms, and  
277 sensitivity set on maximum, giving a continuous sequence of ‘snapshots’, consisting of  
278 320ms of silence (sensor listening) and 3.2 seconds of audio (sensor playback at x 10 speed).  
279 Sound was recorded to an SD card as a WAV file using either an Edirol R-09HR or Roland  
280 R-05 recording device. Due to occasional equipment failure or unforeseen circumstances,  
281 eight recording events were slightly modified before analysis or deleted, resulting in 110  
282 recording events (total of 132.1 hours) from 11 transects (Figure 1a) (see Supplementary  
283 Information Table S1 for details).

284         Audio from each recording event was split into one minute segments and the presence  
285 of bat echolocation calls was manually verified visually using Batsound software (Pettersson  
286 Elektronik). Segments containing echolocation calls were individually detected, and high-  
287 quality calls were located and call parameters were extracted using Sonobat v.3.1.7p (34).  
288 Parameterisation in Sonobat involves the use of amplitude threshold filters and recognition of  
289 smooth frequency changes over time to find calls and to fit a frequency-time trend line to the  
290 shape of the call, from which measurements are extracted. An artificial neural network  
291 (ANN) for European species, iBatsID (25) was used to classify calls to species level,  
292 however calls with a classification probability of under 60% were only classified to species-  
293 group level, as either; ‘*Pipistrellus*’, ‘Serotine/Leisler’s/Noctule’, or ‘Long-eared’. Calls  
294 identified to any *Myotis* species were reclassified as ‘*Myotis*’ due to the difficulty of  
295 distinguishing these species. For *P.pipistrellus*, the focal species of this study, iBatsID has a  
296 correct call classification rate of 97.6% and a false positive rate of 1.4% (25). Individual calls  
297 were grouped into sequences (*‘bat passes’*) for analysis, where calls were assumed to be part  
298 of the same call sequence if they occurred within the same snapshot and if the sequence  
299 continued into subsequent snapshots. Each sequence was classified to a species or species-

Williams *et al.* Impact of streetlight technologies on bats

300 group using either the species or species-group class (if species classifications were  
301 equivocal) of the majority of the echolocation calls (Figure 1b). If there is no majority  
302 species ID to which the sequence can be assigned, the sequence is assigned to the group stage  
303 (e.g. ‘Unknown *Pipistrellus*’). We divided the island of Jersey into 50 x 50m grid cells and  
304 calculated the total number of bat passes from each species in each 50 x 50m grid cell that  
305 intersected a transect road per recording event. This spatial resolution was used as it was  
306 assumed to be the maximum size at which only one sampled road was included in each grid  
307 square.

308

309 *(ii) Street lighting technology and environmental spatial data*

310 Streetlights were located along bat transect roads using data compiled from the States of  
311 Jersey lighting surveys conducted in 2011 and updated in 2017. As only approximate  
312 locations were provided, we manually ground-truthed the exact position of all streetlights  
313 along the transect roads. Data on model type and wattage of each streetlight from the Jersey  
314 Electricity Company (JEC) was used to determine the locations of lights belonging to the  
315 three different technologies: high pressure sodium (HPS), metal halide (MH), and light  
316 emitting diode (LED) (Figure 1c). In 2014, the States of Jersey began to replace end of life  
317 HPS streetlights with LEDs. We created two datasets, pre and post-2014, to account for these  
318 changes. The pre-2014 dataset includes only HPS (n=935) and MH streetlights (n=138). The  
319 post-2014 dataset includes HPS (n=599), MH (n=138) and LED streetlights (n=336))  
320 accounting for any changes in HPS streetlights to LEDs that occurred from 2014 until the  
321 latest lighting survey in 2017. Data concerning the exact date from 2014 -2017 when each  
322 end of life HPS light was replaced with LEDs was unavailable, so we assume an immediate  
323 transition (i.e. all LED lights recorded in the lighting survey of 2017 were present from 2014  
324 onwards). We then created 50 x 50m resolution lighting layers for our analysis, displaying

Williams *et al.* Impact of streetlight technologies on bats

325 the number of columns of each streetlight type in each cell pre and post-2014. As some roads  
326 in Jersey are not lit by streetlights, our analysis inherently compares bat activity in unlit areas  
327 versus lit areas.

328 We also collected information on habitat and road-type variables found to be  
329 important correlates of bat activity (4,35,36). Data on six key habitat variables (arable,  
330 grassland, water, woodland, urban and unclassified) were extracted from a Phase 1 Habitat  
331 Survey of Jersey in 2011, provided by the States of Jersey (37) (Supplementary Information  
332 Figure S1). The original shapefile was converted into a 2m<sup>2</sup> resolution gridded layer for each  
333 habitat type using the *raster* package (38) in R (39). We chose this resolution to ensure  
334 maximum preservation of spatial information whilst maintaining computational efficiency.  
335 Percentage cover of each habitat type was calculated for each 50 x 50m grid cell which  
336 intersected a bat transect road by aggregating the 2m<sup>2</sup> grid cells in the high-resolution raster.  
337 Bat transect roads were categorised into three types using the definitions in the Phase 1  
338 Habitat Survey; ‘Minor’, ‘Main’ and ‘Major’ (Figure 1C), and we created a 50 x 50m  
339 resolution grid of all cells that intersected transect roads, whose values corresponded to the  
340 type of road in each cell. In the few cases that multiple road types occurred per cell, the road  
341 type that covered the greatest area was assigned. We also created separate 50 x 50m  
342 resolution grids displaying the temperature and wind speed values recorded at the start of  
343 each recording event.

344

345 *(iii) Statistical analyses*

346 We used a generalised linear mixed model (GLMM) with a Poisson error distribution using  
347 the lme4 package in R version 3.4.2 (39) to examine the relationship between *P.pipistrellus*  
348 activity and densities of different streetlight technologies, habitat and road-type, and climatic  
349 variables in 50 x 50m grids on and around bat transect roads. We also included a temporal



Williams *et al.* Impact of streetlight technologies on bats

350 random effect in the model, where month was nested within year, as we found a temporal  
351 trend of increasing bat activity over the study period (2011-2015) (Supplementary  
352 Information Figure S2, Table S2) and to account for the repeated sampling of each grid cell.  
353 Transect ID was not included as a random effect because transects exhibited minimal spatial  
354 overlap and were each surveyed only once per month, and therefore a month nested within  
355 year random effect is sufficient to account for repeated sampling of grid cells. The  
356 *P.pipistrellus* activity data were slightly zero-inflated which could impact parameter  
357 estimates, however we found little difference in results when fitting a zero-inflated Poisson  
358 model in glmmTMB package in R version 3.4.2 (39), so we do not report the results here. Bat  
359 activity data recorded from 2011-13 and from 2014-2015 were paired with the pre-and post-  
360 2014 lighting technology datasets, respectively. Continuous predictors (all lighting density  
361 and habitat-type variables plus temperature) were centred and scaled (subtracting mean and  
362 dividing by standard deviation) to facilitate model convergence and to make their effect sizes  
363 biologically interpretable (40). To account for spatial autocorrelation, an autocovariate was  
364 included as an additional predictor variable (41). This is calculated for each 50 x 50m grid  
365 cell as a distance-weighted average of neighbouring response values (number of detections  
366 per cell) (42). Neighbourhood distance was set to the minimum distance at which no cells had  
367 zero neighbours (spdep package in R version 3.4.2) (43,44). All variables were checked for  
368 multicollinearity by calculating correlation coefficients between each variable. In all cases,  $r$   
369  $< 0.7$  so no variables were excluded (45).

370 We adopted an information-theoretic approach (IT) to construct averaged models  
371 using the *MuMIn* package (46). Firstly, all the variables were used in the initial model. Next,  
372 a comprehensive set of models was derived that represented every permutation of all the  
373 variables specified in the initial model. The corrected small-sample Akaike Information  
374 Criterion weight (AICc) and the difference between a given model and the model with the



Williams *et al.* Impact of streetlight technologies on bats

375 lowest AIC ( $\Delta$ AIC) was then calculated for each model. Any model with a  $\Delta$ AIC >7 was  
376 deemed uninformative and discarded (47). The average parameter estimate of each variable  
377 was then calculated across all informative models, and its relative importance was estimated  
378 by summing the AICc weights of all informative models that included that particular variable  
379 (27) (see Supplementary Information Table S3 for all informative models). Since the results  
380 of our spatial analysis could be sensitive to spatial scale, we also conducted these analyses at  
381 a grid cell size of 100 x 100m. The results for both scales were qualitatively similar  
382 (Supplementary Information Table S4), so we present our models here using 50 x 50m grid  
383 cells.

384         The averaged model of *P.pipistrellus* activity constructed at 50 x 50m was then  
385 projected across the entire island of Jersey using the percentage cover data from each habitat  
386 variable in all cells (including those in which no sampled road was found). This provided a  
387 visual representation of the spatial variation in bat activity and enabled the identification of  
388 critical habitat areas that may be particularly sensitive to placement of lighting. As data on  
389 lighting variables were only available for the sampled cells, they were removed from the  
390 predictive process by setting the island wide-density per cell to zero (i.e. predicting habitat  
391 suitability in the absence of lighting). Island-wide data on variables that represented factors  
392 (wind and road-type) were also unavailable for non-sampled cells. To enable prediction, they  
393 were set to their base condition ('Calm' for wind, 'Minor' for road-type in all cells (including  
394 sampled cells).

395

### 396 **Data Accessibility**

397 All code and data is available on figshare:

398 1. Code: <https://figshare.com/s/340bfb9e7530698d9818>

399 2. Raw data: <https://figshare.com/s/c29d41f47f0a10299721>

Williams *et al.* Impact of streetlight technologies on bats

400 3. Processed data: <https://figshare.com/s/a1b5745966559428596d>

401

402 **Acknowledgements**

403 We thank H Ferguson-Gow for technical assistance, and Department for Infrastructure, States  
404 of Jersey and the Jersey Electricity Company (JEC) for providing lighting data. This work  
405 was funded with support from States of Jersey (KEJ and CW), a Graduate Research  
406 Scholarship from University College London (RG), and NERC PhD studentship  
407 (NE/L002485/1) (EB).

408

409 **References**

- 410 1. Newbold T, Hudson LN, Hill SL, Contu S, Lysenko I, Senior R, et al. Global effects of  
411 land use on local terrestrial biodiversity. *Nature*. 2015;520(7545):45-50.
- 412 2. Irwin EG, Bockstael NE Land use externalities, open space preservation, and urban  
413 sprawl. *Reg Sci Urban Econ*. 2004;34(6):705–25.
- 414 3. Ibisch PL, Hoffmann MT, Kreft S, Pe’er G, Kati V, Biber-Freudenberger L, et al. A  
415 global map of roadless areas and their conservation status. *Science Advances*.  
416 2016;354(6318):1423-1427.
- 417 4. Berthinussen A, Altringham J. The effect of a major road on bat activity and diversity.  
418 *J Appl Ecol*. 2012;49(1):82–89.
- 419 5. Kyba CCM, Kuester T, Miguel AS De, Baugh K, Jechow A, Hölker F, et al.  
420 Artificially lit surface of Earth at night increasing in radiance and extent. *Science*  
421 *Advances*. 2017;3(11):e1701528.
- 422 6. Knop E, Zoller L, Ryser R, Gerpe C, Hörler M, Fontaine C. Artificial light at night as  
423 a new threat to pollination. *Nature*. 2017;548(7666):206–209.
- 424 7. Dominoni D, Quetting M, Partecke J. Artificial light at night advances avian

Williams *et al.* Impact of streetlight technologies on bats

- 425 reproductive physiology. Proc R Soc Lond [Biol]. 2013; 280(1756):20123017.
- 426 8. Stone EL, Jones G, Harris S. Street Lighting Disturbs Commuting Bats. Curr Biol.  
427 2009;19(13):1123–7.
- 428 9. Mickleburgh SP, Hutson AM, Racey PA. A review of the global conservation status of  
429 bats Major threats. Oryx. 2002;36(1):18–34.
- 430 10. Jones G, Jacobs DS, Kunz TH, Wilig MR, Racey PA. Carpe noctem: The importance  
431 of bats as bioindicators. Endanger Species Res. 2009;8(1–2):93–115.
- 432 11. Kelt DA, Van Vuren D. Energetic Constraints and the Relationship between Body Size  
433 and Home Range Area in Mammals. Ecology. 1999;80(1):337-340.
- 434 12. Fensome AG, Mathews F. Roads and bats: a meta-analysis and review of the evidence  
435 on vehicle collisions and barrier effects. Mamm Rev. 2016;46(4):311–23.
- 436 13. Stone EL, Harris S, Jones G. Impacts of artificial lighting on bats : A review of  
437 challenges and solutions and solutions. Mamm Biol. 2015;80(3):213-219.
- 438 14. Blake D, Hutson AM, Racey PA, Rydell J, Speakman JR. Use of lamplit roads by  
439 foraging bats in southern England. J Zool. 1994;234(3):453–62.
- 440 15. Rydell J. Seasonal use of illuminated areas by foraging northern bats *Eptesicus*  
441 *nilssoni*. Ecography. 1991;14(3):203–7.
- 442 16. Rydell J. Exploitation of Insects around Streetlamps by Bats in Sweden. Funct Ecol.  
443 1992;6(6):744–50.
- 444 17. Eisenbeis, G. Artificial night lighting and insects: Attraction of insects to streetlamps  
445 in a rural setting in Germany. In: Ecological Consequences of Artificial Night  
446 Lighting. Washington D.C: Island Press; 2006. p 281-304.
- 447 18. Lewanzik D, Voigt CC. Transition from conventional to light-emitting diode street  
448 lighting changes activity of urban bats. J Appl Ecol. 2017;2(1):264–71.
- 449 19. Davies TW, Bennie J, Inger R. Artificial light pollution : are shifting spectral

Williams *et al.* Impact of streetlight technologies on bats

- 450 signatures changing the balance of species interactions? *Global Change Biol.*  
451 2013;19(5):1417–23.
- 452 20. Hölker F, Moss T, Griefahn B, Kloas W, Voigt CC. The Dark Side of Light : A  
453 Transdisciplinary Research Agenda for Light Pollution Policy. *Ecol Soc.*  
454 2010;15(4):13.
- 455 21. Stone EL, Wakefield A, Harris S, Jones G. The impacts of new street light  
456 technologies : experimentally testing the effects on bats of changing from low-  
457 pressure sodium to white metal halide. *Philos Trans R Soc B.*  
458 2015;370(1667):20140127.
- 459 22. Stone EL, Jones G, Harris S. Conserving energy at a cost to biodiversity? Impacts of  
460 LED lighting on bats. *Glob Chang Biol.* 2012;18(8):2458–65.
- 461 23. Mathews F, Roche N, Aughney T, Jones N, Day J, Baker J, et al. Barriers and benefits:  
462 implications of artificial night-lighting for the distribution of common bats in Britain  
463 and Ireland. *Philos. Trans. R. Soc. B.* 2015;370(1667):20140124.
- 464 24. Azam C, Le Viol I, Julien J-F, Bas Y, Kerbiriou C. Disentangling the relative effect of  
465 light pollution, impervious surfaces and intensive agriculture on bat activity with a  
466 national-scale monitoring program. *Landsc Ecol.* 2016;31(10):2471–83.
- 467 25. Walters CL, Freeman R, Collen A, Dietz C, Brock Fenton M, Jones G, et al. A  
468 continental-scale tool for acoustic identification of European bats. *J Appl Ecol.*  
469 2012;49(5):1064–74.
- 470 26. Jones KE, Russ JA, Bashta A-T, Bilhari Z, Catto C, Csósz I, et al. Indicator Bats  
471 Program: A System for the Global Acoustic Monitoring of Bats. In: *Biodiversity*  
472 *Monitoring and Conservation.* New York: Wiley-Blackwell; 2013. p. 211–47.
- 473 27. Grueber CE, Nakagawa S, Laws RJ, Jamieson IG. Multimodel inference in ecology  
474 and evolution: Challenges and solutions. *J Evol Biol.* 2011;24(4):699–711.

Williams *et al.* Impact of streetlight technologies on bats

- 475 28. Wakefield A, Broyles M, Stone EL, Harris S, Jones G. Quantifying the attractiveness  
476 of broad-spectrum street lights to aerial nocturnal insects. *J Appl Ecol.* 2017;55:714-  
477 722.
- 478 29. Rowse EG, Lewanzik D, Stone EL, Harris S, Jones G. Dark Matters : The Effects of  
479 Artificial Lighting on Bats. In: *Bats in the Anthropocene: Conservation of Bats in a*  
480 *Changing World.* Springer Cham; 2015. p. 187–213.
- 481 30. Downs N, Racey PA. The use by bats of habitat features in mixed farmland in  
482 Scotland. *Acta Chiropterologica. Acta Chiropt.* 2006;8(2):445–50.
- 483 31. Davidson-Watts I, Walls S, Jones G. Differential habitat selection by *Pipistrellus*  
484 *pipistrellus* and *Pipistrellus pygmaeus* identifies distinct conservation needs for cryptic  
485 species of echolocating bat. *Biol Cons.* 2006; 133(1):118-127.
- 486 32. Arlettaz È, Godat S, Meyer H. Competition for food by expanding pipistrelle bat  
487 populations (*Pipistrellus pipistrellus*) might contribute to the decline of lesser  
488 horseshoe bats (*Rhinolophus hipposideros*). *Biol Cons.* 2000;93(1):55–60.
- 489 33. Spoelstra K, Grunsven RHA Van, Ramakers JJC, Ferguson KB, Raap T, Donners M,  
490 et al. Response of bats to light with different spectra : light-shy and agile bat presence  
491 is affected by white and green , but not red light. *Proc R Soc London [Biol].*  
492 2017;284(1855):20170075.
- 493 34. Szewczak, J.M. 2014. SonoBat v.3.1.7 [www.sonobat.com](http://www.sonobat.com).
- 494 35. Kerth G, Melber M. Species-specific barrier effects of a motorway on the habitat use  
495 of two threatened forest-living bat species. *Biol Cons.* 2009;142(2):270–279.
- 496 36. Walsh AL, Harris S. Factors Determining the Abundance of Vespertilionid Bats in  
497 Britain : Geographical , Land Class and Local Habitat Relationships. *J Appl Ecol.*  
498 1996;33;519-529.
- 499 37. JNCC. Handbook for Phase 1 habitat survey - a technique for environmental audit.

Williams *et al.* Impact of streetlight technologies on bats

- 500 Joint Nature Conservation Committee, Peterborough, UK, 2010.
- 501 38. Hijmans, R., J., raster: Geographic Data Analysis and Modeling. R package  
502 version 2.5-8., 2016.
- 503 39. R Core Team, (2017) R- A language and environment for statistical computing.
- 504 40. Schielzeth H. Simple means to improve the interpretability of regression coefficients.  
505 *Methods Ecol Evol.* 2010;1(2):103–13.
- 506 41. Bivand, R., Piras, G. Comparing Implementations of Estimation Methods for  
507 Spatial Econometrics. *J Stat Softw.* 2015;63(18):1-36.
- 508 42. Dormann C, McPherson J, B. Araújo M, Bivand R, Bolliger J, Carl G, et al. Methods  
509 to account for spatial autocorrelation in the analysis of species distributional data: a  
510 review. *Ecography* 2007;30(5):609–28.
- 511 43. Brierley L, Vonhof MJ, Olival KJ, Daszak P, Jones KE. Quantifying Global Drivers of  
512 Zoonotic Bat Viruses: A Process-Based Perspective. *Am Nat.* 2016;187(2):E53–64.
- 513 44. Augustin ANH, Muggleston MA, Buckland ST. An Autologistic Model for the  
514 Spatial Distribution of Wildlife. *J Appl Ecol.* 1996;33(2):339–47.
- 515 45. Dormann CF, Elith J, Bacher S, Buchmann C, Carl G, Carr G, et al. Collinearity : a  
516 review of methods to deal with it and a simulation study evaluating their performance.  
517 *Ecography.* 2013;36(1):27–46.
- 518 46. Bartoń, K. MuMIn: Multi-Model Inference. R package version 1.15.6., 2016.
- 519 47. Burnham KP, Anderson DR, Huyvaert KP. AIC model selection and multimodel  
520 inference in behavioral ecology: Some background, observations, and comparisons.  
521 *Behav Ecol Sociobiol.* 2011;65(1):23–35.
- 522  
523

Williams *et al.* Impact of streetlight technologies on bats

524 **Table 1:** Spectral bandwidth and UV-content of the four main streetlight types. In our study  
525 area, only HPS, LED and MH lights were present.

| <b>Light-type</b>          | <b>Spectral bandwidth</b> | <b>UV-emission</b> |
|----------------------------|---------------------------|--------------------|
| Low pressure sodium (LPS)  | Narrow                    | No                 |
| High pressure sodium (HPS) | Broad                     | No                 |
| Light-emitting diode (LED) | Broad                     | No                 |
| Metal halide (MH)          | Broad                     | Yes                |

526

527

Williams *et al.* Impact of streetlight technologies on bats

528 **Table 2:** Averaged GLMM examining landscape effects of broad-spectrum lighting  
 529 technologies and other spatial environmental variables on *Pipistrellus pipistrellus* activity.  
 530 Regression coefficients ( $\beta$ ) and 95% confidence intervals (,) are derived from each set of  
 531 informative models ( $\Delta AIC < 7$ ) (see Supplementary Information Table S3).  $W$  = cumulative  
 532 AICc weights of all informative models that contain a given predictor variable. Significant  
 533 predictors are shown in bold. All the predictor variables except road type and wind were  
 534 centred and scaled (subtracting mean and dividing by standard deviation), meaning that the  
 535 magnitude of each predictor variables effect on bat activity (the average regression  
 536 coefficients) are directly comparable.  
 537

| Predictors                 | <i>P. pipistrellus</i> activity            |                           |                                |
|----------------------------|--------------------------------------------|---------------------------|--------------------------------|
|                            | Average regression coefficient ( $\beta$ ) | (95% confidence interval) | Cumulative AICc weight ( $W$ ) |
| (intercept)                | -3.37                                      | (-3.51, -3.24)            | 1.00                           |
| HPS density (columns/cell) | <b>-0.10</b>                               | <b>(-0.16, -0.04)</b>     | <b>1.00</b>                    |
| LED density (columns/cell) | <b>-0.08</b>                               | <b>(-0.15, -0.01)</b>     | <b>0.98</b>                    |
| MH density (columns/cell)  | -0.01                                      | (-0.06, 0.04)             | 0.29                           |
| Arable Land (% cover)      | 0.01                                       | (-0.03, 0.06)             | 0.41                           |
| Urban (% cover)            | <b>-0.19</b>                               | <b>(-0.25, -0.13)</b>     | <b>1.00</b>                    |
| Grassland (% cover)        | -0.00                                      | (-0.03, 0.03)             | 0.29                           |
| Water (% cover)            | <b>0.06</b>                                | <b>(0.04, 0.08)</b>       | <b>1.00</b>                    |
| Woodland (% cover)         | <b>0.12</b>                                | <b>(0.08, 0.16)</b>       | <b>1.00</b>                    |
| Road type (Major)          | <b>-1.97</b>                               | <b>(-3.15, -0.79)</b>     | <b>1.00</b>                    |
| Road type (Main)           | <b>-0.18</b>                               | <b>(-0.26, -0.09)</b>     | <b>1.00</b>                    |



Williams *et al.* Impact of streetlight technologies on bats

|                       |             |                     |             |
|-----------------------|-------------|---------------------|-------------|
| Temperature (°C)      | -0.05       | (-0.11, 0.01)       | 0.88        |
| Wind (Breezy)         | <b>0.20</b> | <b>(0.03, 0.38)</b> | <b>0.95</b> |
| Wind (Light)          | <b>0.10</b> | <b>(0.00, 0.19)</b> | <b>0.95</b> |
| Spatial autocovariate | <b>0.20</b> | <b>(0.18, 0.23)</b> | <b>1.00</b> |

538

Williams *et al.* Impact of streetlight technologies on bats

539 **Figure legends**

540 **Figure 1.** Island of Jersey showing the distribution of (A) transects, (B) roads, road type, and  
541 street lighting along road transects, and (C) bat species/species groups recorded. Coloured  
542 lines in (A) represent acoustic iBats road transects (n=11), each driven twice yearly from  
543 2011-2015. Different coloured dots in (B) represent different lighting technologies, where  
544 yellow is high pressure sodium (HPS), blue is light emitting diode (LED), and pink is metal  
545 halide (MH). The distribution of lighting technologies along road transects represent the  
546 situation post 2014. Pre-2014 the lights shown as LED were HPS. Minor and major roads are  
547 shown as grey and black lines, respectively. The only major road in Jersey runs along the  
548 central-southern coast (long row of MH lights). Coloured dots in (C) represent bat passes for  
549 different species/species groups from all iBats car-driven surveys from 2011-2015 (n=110  
550 recording events).

551

552 **Figure 2.** Number of bat passes recorded per iBats car-driven survey in Jersey from 2011-  
553 2015 for each species or species group, shown on natural log scale. Boxes show median and  
554 interquartile range and whiskers represent variability outside the upper and lower quartiles,  
555 with outliers plotted as individual points. See Table S2 for yearly totals.

556 **Figure 3.** Average regression coefficients of lighting and habitat predictors from GLMM of  
557 *Pipistrellus pipistrellus*. Significant predictors are those whose 95% confidence interval  
558 (shown as error bars) does not include zero. The predictors (all lighting and habitat variables)  
559 shown have been centred and scaled (subtracting mean and dividing by standard deviation),  
560 meaning that the magnitude of the effects of each predictor variable on bat activity (the  
561 average regression coefficients) are directly comparable. Climatic and road-type variables are  
562 not shown, as they represented factors which could not be scaled, so coefficients could not be  
563 compared.

Williams *et al.* Impact of streetlight technologies on bats

564 **Figure 4.** Spatial predictions of *P.pipistrellus* activity in the absence of artificial lighting  
565 from the averaged GLMM. Note that grid cell values are the result of prediction from an  
566 averaged model based in part on scaled variables so have no direct interpretation. Red  
567 corresponds to habitat where activity is predicted to be highest and blue, the lowest. Roads  
568 (black lines) are also shown to enable identification of the areas that may be particularly  
569 sensitive to placement of streetlights.

Williams *et al.* Impact of streetlight technologies on bats

570 **Figure 1**

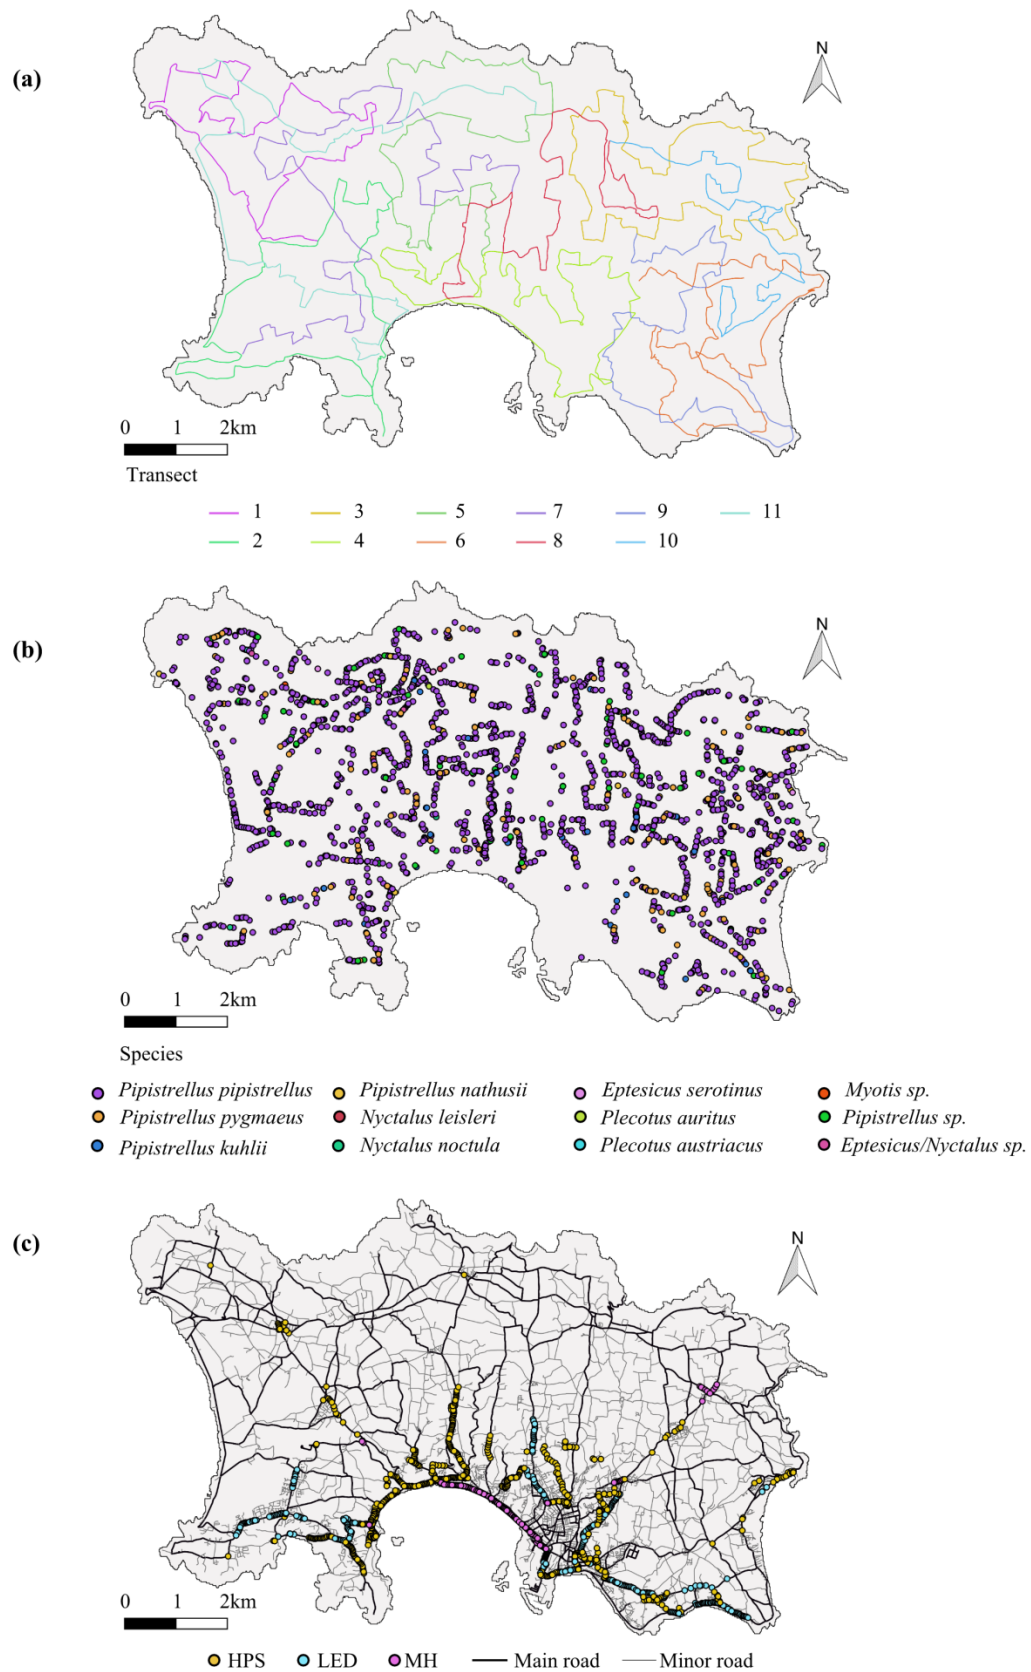

571  
572

Williams *et al.* Impact of streetlight technologies on bats

573 **Figure 2.**

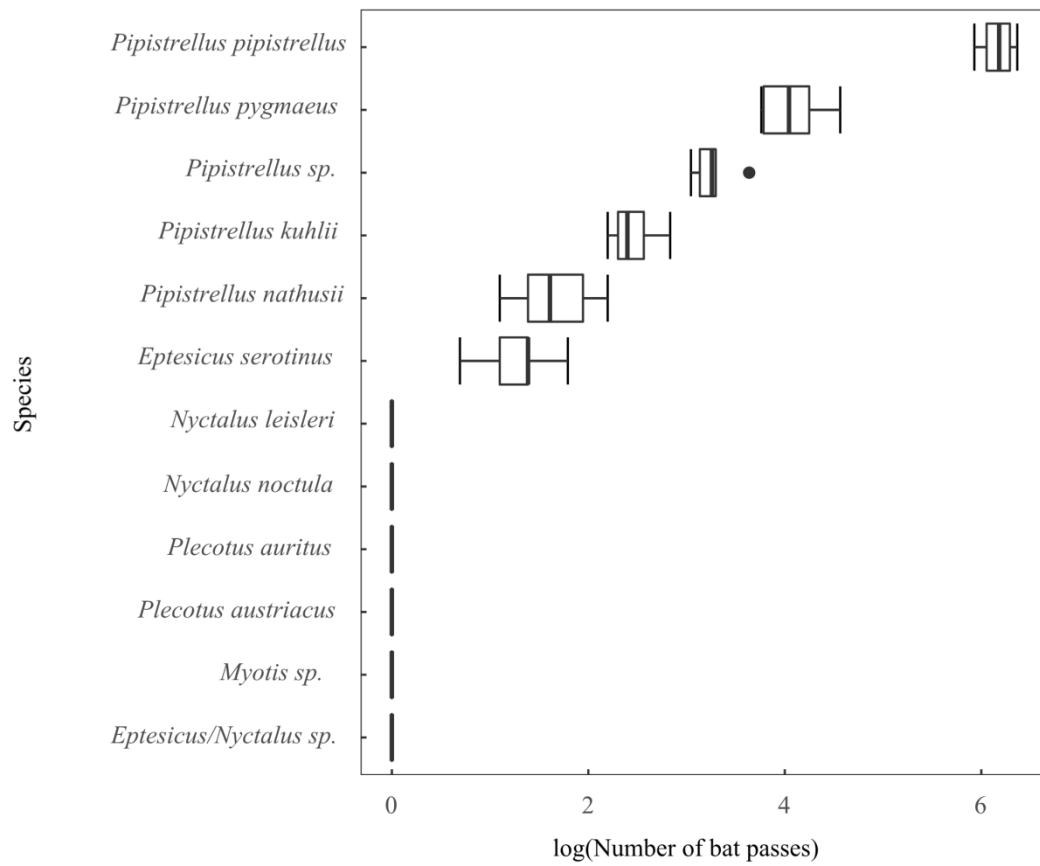

574

Williams *et al.* Impact of streetlight technologies on bats

575 **Figure 3.**

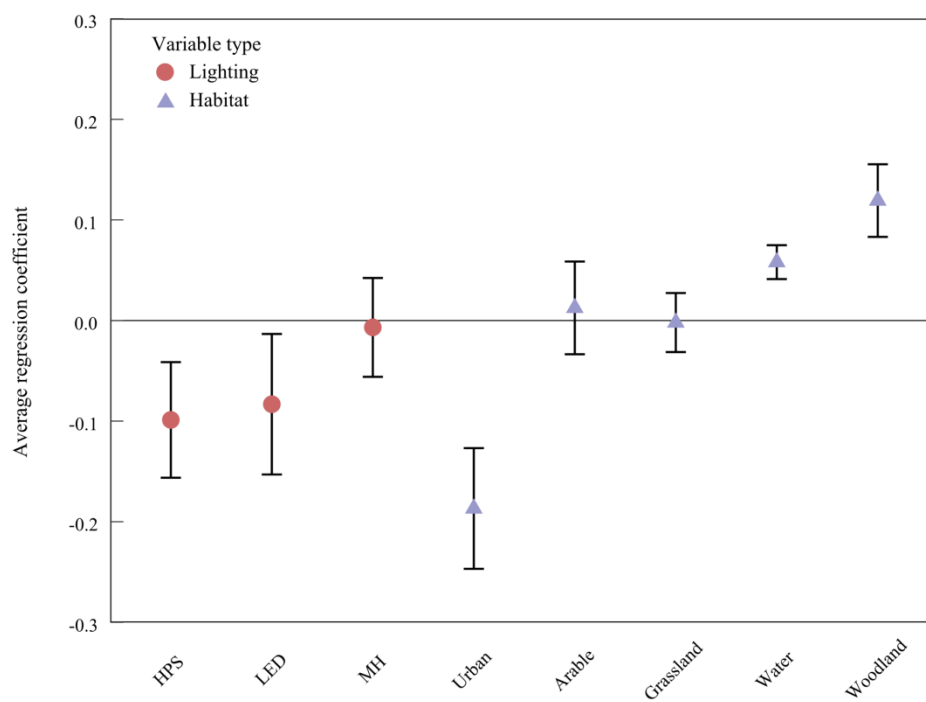

576

577

Williams *et al.* Impact of streetlight technologies on bats

578 **Figure 4.**

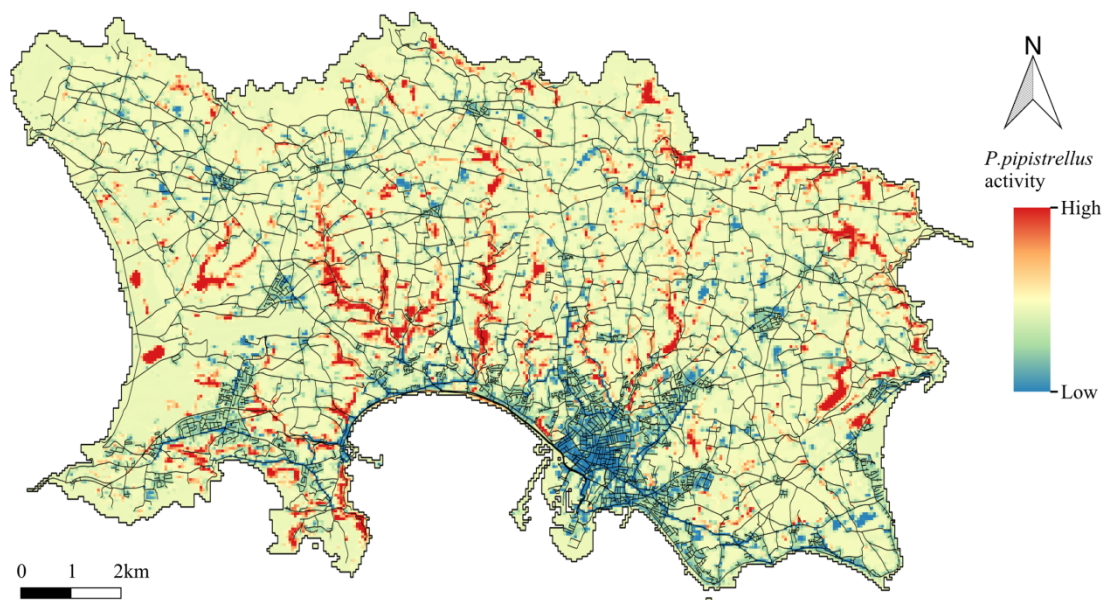

579

Williams *et al.* Impact of streetlight technologies on bats

580 **Supplementary Information Methods**

581 Indicator Bats Programme Protocols

582 Citizen scientists within the iBats programme (Jones et al. 2013) collected full-spectrum  
583 acoustic recordings of approximately 70 minutes, along ~25km road transects routes, driven  
584 at 25 km/h and starting 30-45 minutes after sunset. Each transect was surveyed twice yearly  
585 during July to August (the period of peak seasonal activity for most northern European  
586 species) spanning a period from 2011-2015 across the island of Jersey. Acoustic data was  
587 recorded with a time-expansion (TE) device equipped with a wideband capacitance  
588 microphone with the frequency range 10-160 kHz and a sample rate of 409.6 kHz  
589 (Tranquility Transect, Courtplan Design Ltd, UK). The recording devices were set to record  
590 using a TE factor of 10, sampling time of 320 ms and sensitivity set on maximum, giving a  
591 continuous sequence of ‘snapshots’, consisting of 320 ms of silence (sensor listening) and  
592 3.2s of TE audio played backed 10 times slower than real time. The recording device was  
593 attached to the front or back passenger window of the vehicle with the microphone pointing  
594 up and back at a 45° angle. Edirol R-09HR or Roland R-05 recording devices were used to  
595 record audio without compression or using a lossless compression, and native files were  
596 transformed into wav format. A GPS track of the transect route was recorded using a  
597 Samsung GT S77710 phone with a built in Global Positioning System (GPS) taking readings  
598 every 5 seconds via OruxMaps or other GPS options, and the transect tracks were recorded as  
599 GPX files. The sound recorder and GPS track were set to start recording at the same time so  
600 that the position of the car when each bat is recorded could be determined. Each recorded bat  
601 call was subsequently georeferenced using this GPS track. Surveys were only carried out  
602 during ‘fine’ weather; i.e. when the air temperature was greater than 7°C, and no more than  
603 very light rain or wind. The following metadata were also recorded at the start and end of  
604 each transect: temperature (°C); cloud cover (%); rain (dry, drizzle, light); and wind speed



Williams *et al.* Impact of streetlight technologies on bats

605 (calm, light, or breezy). Humidity data for the start and end of each transect was obtained  
606 from the States of Jersey Department for Environment - Meteorological Section.

Williams *et al.* Impact of streetlight technologies on bats

607 **Table S1.** Details of the iBats car driven acoustic transects (n=11) carried out between 2011-  
 608 2015 on the island of Jersey, including the faulty recordings and how these were used in the  
 609 analysis.

610

| Transect | Date     | Sound Length (s) | GPS Length (km) | Description of any faults and action taken                                                     |
|----------|----------|------------------|-----------------|------------------------------------------------------------------------------------------------|
| T01      | 14/07/11 | 4210             | 25.50           |                                                                                                |
|          | 06/08/11 | 4432             | 26.33           |                                                                                                |
|          | 10/07/12 | 4222             | 25.31           |                                                                                                |
|          | 01/08/12 | 4376             | 25.59           |                                                                                                |
|          | 05/07/13 | 4256             | 25.36           |                                                                                                |
|          | 04/08/13 | 1893             | 25.46           | Faulty recording from 31m11s – end. Sound file and GPS length cut from the start of the fault. |
|          | 14/07/14 | 4360             | 25.40           |                                                                                                |
|          | 03/08/14 | 4278             | 25.36           |                                                                                                |
|          | 11/07/15 | 4418             | 25.39           |                                                                                                |
|          | 02/08/15 | 4583             | 25.37           |                                                                                                |
| T02      | 15/07/11 | 4368             | 26.71           |                                                                                                |
|          | 04/08/11 | 4428             | 26.61           |                                                                                                |
|          | 19/07/12 | 4559             | 26.90           |                                                                                                |
|          | 11/08/12 | 4522             | 26.78           |                                                                                                |
|          | 25/07/13 | 1891             | 26.64           | Batteries ran out midway through transect. Transect repeated again. Both included in analyses. |
|          | 28/07/13 | 4362             | 26.64           |                                                                                                |
|          | 22/08/13 | 4405             | 26.63           |                                                                                                |
|          | 01/07/14 | 4497             | 26.70           | Faulty connection between 6m -9m38s. Section removed from sound file and GPS file.             |
|          | 20/07/14 | 4448             | 26.69           |                                                                                                |
|          | 14/08/14 | 4417             | 26.94           |                                                                                                |
|          | 01/07/15 | 4332             | 26.83           | Recording blank from 72m13s –end. Sound file and GPS file cut.                                 |
| 09/08/15 | 4519     | 26.62            |                 |                                                                                                |
| T03      | 20/07/11 | 4436             | 26.84           |                                                                                                |
|          | 19/08/11 | 4495             | 26.52           |                                                                                                |
|          | 14/07/12 | 4406             | 26.55           |                                                                                                |
|          | 28/08/12 | 4387             | 26.61           |                                                                                                |
|          | 09/07/13 | 4424             | 26.65           |                                                                                                |
|          | 27/08/13 | 4530             | 26.62           |                                                                                                |
|          | 22/07/14 | 4409             | 26.60           |                                                                                                |
|          | 08/08/14 | 4634             | 26.85           |                                                                                                |
|          | 10/07/15 | 4628             | 26.62           |                                                                                                |
|          | 04/08/15 | 4480             | 26.60           |                                                                                                |

Williams *et al.* Impact of streetlight technologies on bats

|     |          |      |       |                                                                                                                    |
|-----|----------|------|-------|--------------------------------------------------------------------------------------------------------------------|
| T04 | 21/07/11 | 5433 | 31.68 | Recording cuts out at 19m55.8s and restarts at 20m17.2s. Sound file and GPS lengths adjusted.                      |
|     | 20/08/11 | 5232 | 30.82 |                                                                                                                    |
|     | 15/07/12 | 5147 | 30.92 |                                                                                                                    |
|     | 15/08/12 | 5427 | 31.10 |                                                                                                                    |
|     | 15/07/13 | 5301 | 30.96 |                                                                                                                    |
|     | 20/08/13 | 5259 | 30.80 |                                                                                                                    |
|     | 11/07/14 | 5352 | 31.01 |                                                                                                                    |
|     | 04/08/14 | 5296 | 30.89 |                                                                                                                    |
|     | 17/07/15 | 5450 | 30.95 |                                                                                                                    |
|     | 17/08/15 | 5357 | 30.80 |                                                                                                                    |
| T05 | 11/07/11 | 3880 | 23.39 | Faulty recording throughout. Transect excluded from analyses.<br>Blank recording. Transect excluded from analyses. |
|     | 05/08/11 | 3864 | 23.46 |                                                                                                                    |
|     | 11/07/12 | 3887 | 23.31 |                                                                                                                    |
|     | 05/08/12 | 3857 | 23.33 |                                                                                                                    |
|     | 01/07/13 | 0    | 23.45 |                                                                                                                    |
|     | 11/08/13 | 0    | 23.32 |                                                                                                                    |
|     | 03/07/14 | 3954 | 23.53 |                                                                                                                    |
|     | 01/08/14 | 4087 | 23.47 |                                                                                                                    |
|     | 18/07/15 | 4014 | 23.51 |                                                                                                                    |
|     | 07/08/15 | 4027 | 23.29 |                                                                                                                    |
| T06 | 19/07/11 | 4731 | 27.34 |                                                                                                                    |
|     | 10/08/11 | 4586 | 26.67 |                                                                                                                    |
|     | 18/07/12 | 4593 | 26.90 |                                                                                                                    |
|     | 27/08/12 | 4498 | 26.60 |                                                                                                                    |
|     | 08/07/13 | 4593 | 26.71 |                                                                                                                    |
|     | 20/08/13 | 5092 | 26.85 |                                                                                                                    |
|     | 24/07/14 | 4468 | 26.61 |                                                                                                                    |
|     | 09/08/14 | 4744 | 26.64 |                                                                                                                    |
|     | 16/07/15 | 4947 | 26.65 |                                                                                                                    |
|     | 15/08/15 | 4685 | 26.68 |                                                                                                                    |
| T07 | 22/07/11 | 5161 | 30.54 |                                                                                                                    |
|     | 14/08/11 | 5128 | 30.55 |                                                                                                                    |
|     | 23/07/12 | 5143 | 30.54 |                                                                                                                    |
|     | 14/08/12 | 5131 | 30.51 |                                                                                                                    |
|     | 27/07/13 | 5312 | 30.55 |                                                                                                                    |
|     | 15/08/13 | 5177 | 30.54 |                                                                                                                    |
|     | 18/07/14 | 5062 | 30.58 |                                                                                                                    |
|     | 12/08/14 | 5034 | 30.42 |                                                                                                                    |
|     | 03/07/15 | 5185 | 30.58 |                                                                                                                    |
|     | 16/08/15 | 5395 | 30.54 |                                                                                                                    |
| T08 | 27/07/11 | 3723 | 22.18 |                                                                                                                    |
|     | 21/08/11 | 3709 | 21.96 |                                                                                                                    |
|     | 24/07/12 | 3740 | 21.94 |                                                                                                                    |
|     | 17/08/12 | 3719 | 21.94 |                                                                                                                    |
|     | 06/07/13 | 3627 | 21.95 |                                                                                                                    |
|     | 19/08/13 | 3714 | 21.92 |                                                                                                                    |

Williams *et al.* Impact of streetlight technologies on bats

|     |          |      |       |                                                                                                |
|-----|----------|------|-------|------------------------------------------------------------------------------------------------|
|     | 10/07/14 | 3739 | 22.00 |                                                                                                |
|     | 02/08/14 | 3638 | 21.94 |                                                                                                |
|     | 15/07/15 | 3892 | 21.36 |                                                                                                |
|     | 01/08/15 | 3654 | 21.26 |                                                                                                |
| T09 | 26/07/11 | 0    | 20.90 | Detector malfunction. Transect excluded from analyses. Route was repeated again to compensate. |
|     | 16/08/11 | 3703 | 21.00 |                                                                                                |
|     | 23/08/11 | 3550 | 21.03 |                                                                                                |
|     | 04/07/12 | 3474 | 20.88 |                                                                                                |
|     | 07/08/12 | 3579 | 20.89 |                                                                                                |
|     | 20/07/13 | 3554 | 20.95 |                                                                                                |
|     | 16/08/13 | 3947 | 20.96 |                                                                                                |
|     | 21/07/14 | 3685 | 21.11 |                                                                                                |
|     | 16/08/14 | 3767 | 21.23 |                                                                                                |
|     | 02/07/15 | 3923 | 21.34 |                                                                                                |
|     | 26/08/15 | 3881 | 20.93 |                                                                                                |
| T10 | 23/07/11 | 3374 | 20.24 |                                                                                                |
|     | 17/08/11 | 3409 | 20.15 |                                                                                                |
|     | 22/07/12 | 3452 | 20.03 |                                                                                                |
|     | 08/08/12 | 3002 | 20.57 |                                                                                                |
|     | 23/07/13 | 3383 | 20.03 |                                                                                                |
|     | 06/08/13 | 3690 | 20.11 |                                                                                                |
|     | 14/07/14 | 3792 | 20.26 |                                                                                                |
|     | 07/08/14 | 3457 | 20.04 |                                                                                                |
|     | 04/07/15 | 3507 | 19.60 |                                                                                                |
|     | 18/08/15 | 3319 | 19.68 |                                                                                                |
| T11 | 31/07/11 | 4676 | 28.42 |                                                                                                |
|     | 12/08/11 | 4632 | 28.11 |                                                                                                |
|     | 26/07/12 | 4698 | 28.13 |                                                                                                |
|     | 23/08/12 | 4699 | 28.14 |                                                                                                |
|     | 14/07/13 | 4728 | 28.29 |                                                                                                |
|     | 13/08/13 | 4695 | 28.16 |                                                                                                |
|     | 15/07/14 | 4628 | 28.16 |                                                                                                |
|     | 15/08/14 | 4621 | 28.35 |                                                                                                |
|     | 09/07/15 | 4932 | 28.21 |                                                                                                |
|     | 25/08/15 | 4701 | 28.21 |                                                                                                |

Williams *et al.* Impact of streetlight technologies on bats

612 **Figure S1.** Distribution of six key habitat types across the island of Jersey. Habitats were  
613 grouped using the Phase 1 Habitat Survey classes of Jersey are follows: (1) **Arable land**,  
614 including habitats defined as arable land and arable land short term ley; (2) **Urban**, using  
615 habitats defined as buildings; (3) **Grassland** including areas defined as improved, semi-  
616 improved and unimproved grassland, marshy (improved, semi-improved, unimproved and  
617 Oenanthe dominated) grassland, coastal (Molinia, dune and species rich short turf) grassland,  
618 amenity/parkland, gardened, and saltmarsh; (4) **Water**, including areas defined as standing  
619 and running water, brackish pool, swamp; (5) **Woodland**, including areas defined as  
620 plantation, planted broadleaved, semi-natural broadleaved, coniferous, deciduous and mixed  
621 woodland; and (6) **Unclassified**.

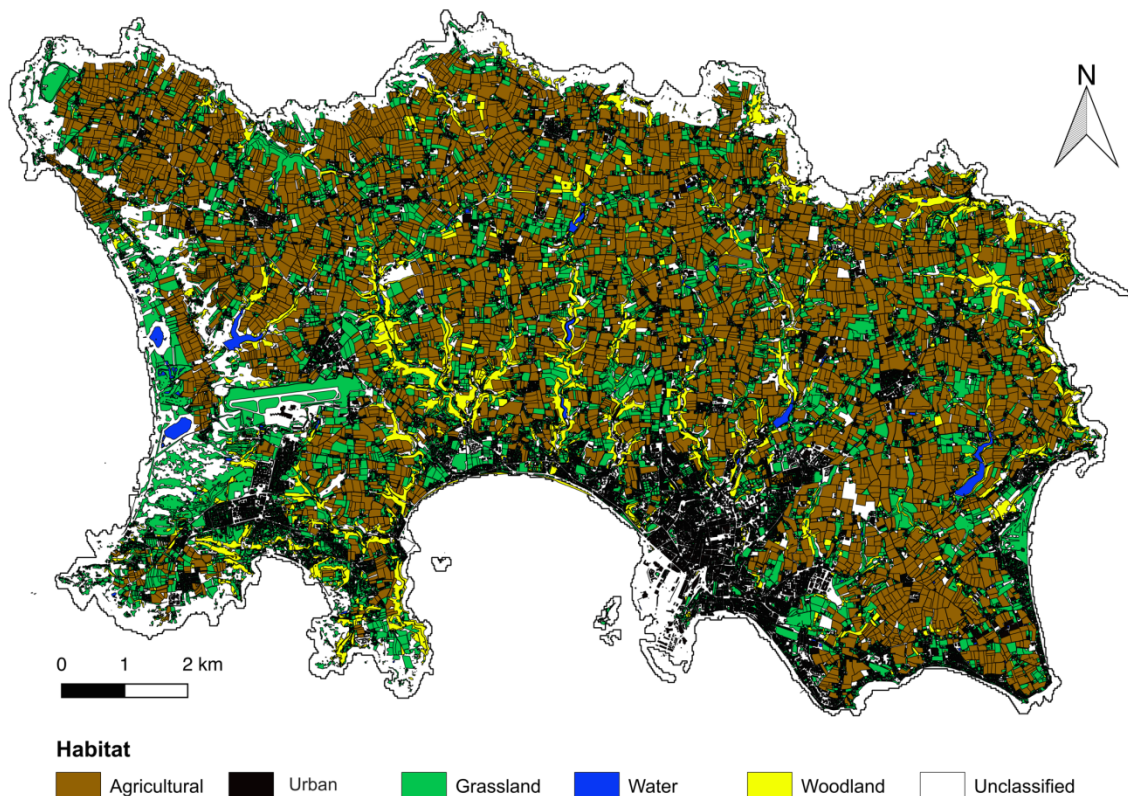

Williams *et al.* Impact of streetlight technologies on bats

622 **Figure S2.** Population trends of (A) total bat passes and for (B) the common pipistrelle  
623 (*Pipistrellus pipistrellus*) only across Jersey from 2011-2015. Population trends were  
624 estimated using a Generalized Additive Model (GAM) with a Poisson error distribution  
625 following (Barlow *et al.*, 2015; Fewster *et al.*, 2000). The baseline year (index = 1.0) was set  
626 as the second year in the time series (2012). Degrees of smoothing were set to 0.4 times the  
627 number of years of survey data. Confidence intervals were obtained by bootstrapping directly  
628 from the index curve. 399 bootstrap replicates were obtained and the confidence intervals  
629 were set to 95%. The significance of the trend (at the 5% significance level) was determined  
630 by whether the confidence intervals in the final year of surveys (2015) overlapped with the  
631 population abundance index of the baseline year (2012). Passes for the measure of total  
632 activity were identified using a species-level classification probability threshold of zero, and  
633 percentage cloud cover was included as a covariate in the trend analyses. Start temperature  
634 and start cloud cover were included as covariates in trend analysis for *P. pipistrellus*. GAMs  
635 were constructed using mgcv 1.8-4 in R (Wood 2011). Total bat activity and *P. pipistrellus*  
636 activity significantly increased by approximately 19% and 34% between 2012-2015,  
637 respectively.  
638

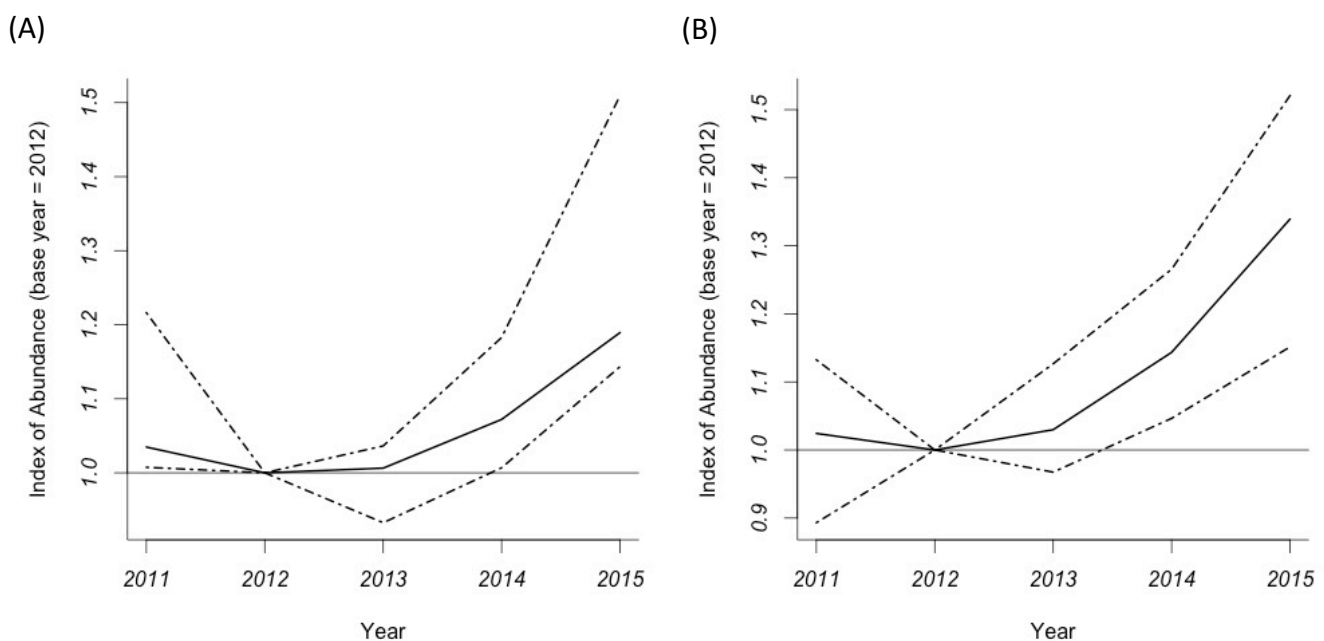

Williams *et al.* Impact of streetlight technologies on bats

639 **Table S2:** Number of passes of each bat species or species group recorded per year in Jersey  
 640 with the percentage of total annual bat passes in parentheses.

| Species                          | Number of passes (% of total annual bat passes) |                |                |                |                |
|----------------------------------|-------------------------------------------------|----------------|----------------|----------------|----------------|
|                                  | 2011                                            | 2012           | 2013           | 2014           | 2015           |
| <i>Pipistrellus pipistrellus</i> | 484<br>(83.45)                                  | 426<br>(80.38) | 376<br>(81.39) | 540<br>(77.47) | 582<br>(82.55) |
| <i>Pipistrellus pygmaeus</i>     | 57<br>(9.83)                                    | 44<br>(8.30)   | 43<br>(9.31)   | 96<br>(13.77)  | 70<br>(9.93)   |
| <i>Pipistrellus kuhlii</i>       | 9<br>(1.55)                                     | 17<br>(3.21)   | 10<br>(2.16)   | 13<br>(1.87)   | 11<br>(1.56)   |
| <i>Pipistrellus nathusii</i>     | 3<br>(0.52)                                     | 9<br>(1.70)    | 5<br>(1.08)    | 4<br>(0.57)    | 7<br>(0.99)    |
| <i>Nyctalus leisleri</i>         | 0<br>(0)                                        | 1<br>(0.19)    | 1<br>(0.22)    | 1<br>(0.14)    | 0<br>(0)       |
| <i>Nyctalus noctula</i>          | 1<br>(0.17)                                     | 1<br>(0.19)    | 0<br>(0)       | 0<br>(0)       | 1<br>(0.14)    |
| <i>Eptesicus serotinus</i>       | 4<br>(0.69)                                     | 4<br>(0.75)    | 2<br>(0.43)    | 3<br>(0.43)    | 6<br>(0.85)    |
| <i>Plecotus auritus</i>          | 0<br>(0)                                        | 0<br>(0)       | 1<br>(0.22)    | 0<br>(0)       | 0<br>(0)       |
| <i>Plecotus austriacus</i>       | 0<br>(0)                                        | 0<br>(0)       | 0<br>(0)       | 1<br>(0.14)    | 1<br>(0.14)    |
| <i>Pipistrellus sp.</i>          | 21<br>(3.62)                                    | 27<br>(5.09)   | 23(4.98)       | 38<br>(5.45)   | 26<br>(3.69)   |
| <i>Eptesicus/Nyctalus sp.</i>    | 1<br>(0.17)                                     | 1<br>(0.19)    | 0<br>(0)       | 1<br>(0.14)    | 1<br>(0.14)    |
| <i>Myotis sp.</i>                | 0<br>(0)                                        | 0<br>(0)       | 1<br>(0.22)    | 0<br>(0)       | 0<br>(0)       |
| <b>TOTAL Species</b>             | <b>6</b>                                        | <b>7</b>       | <b>8</b>       | <b>7</b>       | <b>7</b>       |
| <b>TOTAL Passes</b>              | <b>580</b>                                      | <b>530</b>     | <b>462</b>     | <b>697</b>     | <b>705</b>     |

641

642 **Table S3:** All informative models ( $\Delta\text{AICc} < 7$ ) used to construct average GLMM of *P. pipistrellus* activity (50 x 50m). AC = autocovariate,  
 643  $\Delta\text{AIC}$  = the difference between a given model and the model with the lowest AICc, AIC weight = cumulative AICc weights of all informative  
 644 models that contain a given predictor variable.

645

| Int.   | HPS    | LED    | MH     | Arable | Buildings | Grassland | Water | Woodland | Road type | Temperature | Wind | AC    | AICc  | $\Delta\text{AICc}$ | AICc weight |
|--------|--------|--------|--------|--------|-----------|-----------|-------|----------|-----------|-------------|------|-------|-------|---------------------|-------------|
| -3.371 | -0.100 | -0.086 | -      | -      | -0.194    | -         | 0.057 | 0.115    | +         | -0.058      | +    | 0.203 | 20102 | 0                   | 0.226       |
| -3.375 | -0.097 | -0.084 | -      | 0.029  | -0.178    | -         | 0.059 | 0.125    | +         | -0.057      | +    | 0.202 | 20103 | 0.56                | 0.171       |
| -3.371 | -0.100 | -0.085 | -      | -      | -0.192    | -0.015    | 0.057 | 0.113    | +         | -0.058      | +    | 0.203 | 20104 | 1.48                | 0.108       |
| -3.373 | -0.100 | -0.086 | -0.024 | -      | -0.193    | -         | 0.057 | 0.115    | +         | -0.058      | +    | 0.203 | 20104 | 1.64                | 0.099       |
| -3.378 | -0.098 | -0.084 | -0.023 | 0.029  | -0.178    | -         | 0.059 | 0.125    | +         | -0.057      | +    | 0.202 | 20105 | 2.24                | 0.074       |
| -3.377 | -0.096 | -0.084 | -      | 0.036  | -0.175    | 0.008     | 0.060 | 0.128    | +         | -0.057      | +    | 0.202 | 20105 | 2.49                | 0.065       |
| -3.373 | -0.100 | -0.086 | -0.025 | -      | -0.191    | -0.015    | 0.057 | 0.113    | +         | -0.058      | +    | 0.203 | 20105 | 3.10                | 0.048       |
| -3.369 | -0.101 | -0.086 | -      | -      | -0.194    | -         | 0.058 | 0.116    | +         | -           | +    | 0.204 | 20106 | 3.86                | 0.033       |
| -3.379 | -0.097 | -0.084 | -0.022 | 0.035  | -0.175    | 0.007     | 0.059 | 0.128    | +         | -0.057      | +    | 0.202 | 20107 | 4.19                | 0.028       |
| -3.374 | -0.099 | -0.084 | -      | 0.030  | -0.178    | -         | 0.059 | 0.126    | +         | -           | +    | 0.203 | 20107 | 4.30                | 0.026       |
| -3.310 | -0.097 | -0.084 | -      | -      | -0.193    | -         | 0.058 | 0.118    | +         | -0.059      | -    | 0.206 | 20107 | 5.07                | 0.018       |
| -3.369 | -0.101 | -0.085 | -      | -      | -0.193    | -0.016    | 0.057 | 0.113    | +         | -           | +    | 0.204 | 20108 | 5.29                | 0.016       |
| -3.372 | -0.102 | -0.086 | -0.024 | -      | -0.193    | -         | 0.058 | 0.116    | +         | -           | +    | 0.204 | 20108 | 5.51                | 0.014       |
| -3.313 | -0.094 | -0.082 | -      | 0.026  | -0.179    | -         | 0.059 | 0.127    | +         | -0.059      | -    | 0.205 | 20108 | 5.95                | 0.012       |
| -3.377 | -0.099 | -0.084 | -0.023 | 0.030  | -0.178    | -         | 0.059 | 0.125    | +         | -           | +    | 0.203 | 20108 | 5.99                | 0.011       |
| -3.375 | -0.098 | -0.084 | -      | 0.038  | -0.175    | 0.008     | 0.060 | 0.129    | +         | -           | +    | 0.203 | 20109 | 6.23                | 0.010       |
| -3.361 | -0.097 | -      | -      | -      | -0.200    | -         | 0.058 | 0.116    | +         | -0.058      | +    | 0.204 | 20109 | 6.23                | 0.010       |
| -3.366 | -0.094 | -      | -      | 0.032  | -0.183    | -         | 0.059 | 0.126    | +         | -0.057      | +    | 0.203 | 20109 | 6.45                | 0.009       |
| -3.310 | -0.097 | -0.084 | -      | -      | -0.191    | -0.014    | 0.057 | 0.116    | +         | -0.059      | -    | 0.206 | 20109 | 6.61                | 0.008       |
| -3.312 | -0.097 | -0.084 | -0.023 | -      | -0.192    | -         | 0.058 | 0.118    | +         | -0.059      | -    | 0.206 | 20109 | 6.73                | 0.008       |
| -3.372 | -0.102 | -0.086 | -0.025 | -      | -0.192    | -0.016    | 0.057 | 0.113    | +         | -           | +    | 0.204 | 20109 | 6.92                | 0.007       |

646



647 **Table S4:** All informative models ( $\Delta\text{AICc} < 7$ ) used to construct average GLMM of *P.pipistrellus* activity (100 x 100m). AC = autocovariate,  
 648  $\Delta\text{AIC}$  = the difference between a given model and the model with the lowest AICc, AIC weight = cumulative AICc weights of all informative  
 649 models that contain a given predictor variable.

650

| Int.   | AC    | Arable | Buildings | Grassland | HPS    | LED    | MH    | Road type | Temperature | Water | Wind | Woodland | AICc  | $\Delta\text{AICc}$ | AICc weight |
|--------|-------|--------|-----------|-----------|--------|--------|-------|-----------|-------------|-------|------|----------|-------|---------------------|-------------|
| -2.679 | 0.188 | 0.092  | -0.128    | 0.046     | -0.098 | -0.069 | -     | +         | -0.045      | 0.060 | +    | 0.192    | 16933 | 0                   | 0.169       |
| -2.672 | 0.189 | 0.049  | -0.144    | -         | -0.102 | -0.071 | -     | +         | -0.045      | 0.055 | +    | 0.172    | 16933 | 0.06                | 0.165       |
| -2.665 | 0.190 | -      | -0.171    | -         | -0.105 | -0.073 | -     | +         | -0.046      | 0.052 | +    | 0.154    | 16934 | 1.53                | 0.079       |
| -2.678 | 0.188 | 0.093  | -0.128    | 0.046     | -0.099 | -0.069 | -     | +         | -           | 0.060 | +    | 0.193    | 16934 | 1.62                | 0.075       |
| -2.671 | 0.190 | 0.050  | -0.144    | -         | -0.103 | -0.071 | -     | +         | -           | 0.055 | +    | 0.173    | 16934 | 1.66                | 0.074       |
| -2.678 | 0.188 | 0.092  | -0.128    | 0.046     | -0.098 | -0.069 | 0.005 | +         | -0.045      | 0.060 | +    | 0.192    | 16935 | 1.99                | 0.063       |
| -2.672 | 0.189 | 0.049  | -0.144    | -         | -0.102 | -0.071 | 0.001 | +         | -0.045      | 0.055 | +    | 0.172    | 16935 | 2.06                | 0.061       |
| -2.664 | 0.191 | -      | -0.172    | -         | -0.106 | -0.073 | -     | +         | -           | 0.052 | +    | 0.155    | 16936 | 3.29                | 0.033       |
| -2.665 | 0.190 | -      | -0.169    | -0.010    | -0.105 | -0.073 | -     | +         | -0.046      | 0.051 | +    | 0.153    | 16936 | 3.32                | 0.032       |
| -2.665 | 0.190 | -      | -0.171    | -         | -0.105 | -0.073 | 0.000 | +         | -0.046      | 0.052 | +    | 0.154    | 16936 | 3.53                | 0.029       |
| -2.677 | 0.188 | 0.093  | -0.128    | 0.046     | -0.099 | -0.069 | 0.005 | +         | -           | 0.060 | +    | 0.193    | 16936 | 3.61                | 0.028       |
| -2.671 | 0.190 | 0.050  | -0.144    | -         | -0.103 | -0.071 | 0.002 | +         | -           | 0.055 | +    | 0.173    | 16936 | 3.66                | 0.027       |
| -2.671 | 0.189 | 0.098  | -0.133    | 0.049     | -0.094 | -      | -     | +         | -0.045      | 0.060 | +    | 0.195    | 16936 | 3.68                | 0.027       |
| -2.664 | 0.190 | 0.051  | -0.151    | -         | -0.098 | -      | -     | +         | -0.045      | 0.055 | +    | 0.173    | 16937 | 4.00                | 0.023       |
| -2.664 | 0.191 | -      | -0.170    | -0.010    | -0.106 | -0.073 | -     | +         | -           | 0.051 | +    | 0.154    | 16938 | 5.05                | 0.014       |
| -2.664 | 0.191 | -      | -0.172    | -         | -0.106 | -0.073 | 0.001 | +         | -           | 0.052 | +    | 0.155    | 16938 | 5.29                | 0.012       |
| -2.670 | 0.189 | 0.099  | -0.133    | 0.049     | -0.095 | -      | -     | +         | -           | 0.060 | +    | 0.196    | 16938 | 5.30                | 0.012       |
| -2.665 | 0.190 | -      | -0.169    | -0.010    | -0.105 | -0.073 | 0.000 | +         | -0.046      | 0.051 | +    | 0.153    | 16938 | 5.32                | 0.012       |
| -2.608 | 0.192 | 0.045  | -0.145    | -         | -0.099 | -0.069 | -     | +         | -0.046      | 0.055 | -    | 0.173    | 16938 | 5.40                | 0.011       |
| -2.663 | 0.191 | 0.053  | -0.151    | -         | -0.099 | -      | -     | +         | -           | 0.055 | +    | 0.174    | 16938 | 5.59                | 0.010       |
| -2.613 | 0.191 | 0.086  | -0.130    | 0.043     | -0.095 | -0.067 | -     | +         | -0.047      | 0.060 | -    | 0.192    | 16938 | 5.60                | 0.010       |
| -2.670 | 0.189 | 0.098  | -0.134    | 0.049     | -0.094 | -      | 0.007 | +         | -0.045      | 0.060 | +    | 0.195    | 16938 | 5.65                | 0.010       |

Williams *et al.* Impact of streetlight technologies on bats

|        |       |       |        |   |        |        |       |   |        |       |   |       |       |      |       |
|--------|-------|-------|--------|---|--------|--------|-------|---|--------|-------|---|-------|-------|------|-------|
| -2.656 | 0.192 | -     | -0.180 | - | -0.101 | -      | -     | + | -0.046 | 0.052 | + | 0.155 | 16939 | 5.89 | 0.009 |
| -2.664 | 0.190 | 0.052 | -0.151 | - | -0.098 | -      | 0.004 | + | -0.045 | 0.055 | + | 0.173 | 16939 | 5.99 | 0.008 |
| -2.602 | 0.194 | -     | -0.170 | - | -0.102 | -0.071 | -     | + | -0.047 | 0.052 | - | 0.157 | 16939 | 6.36 | 0.007 |

651

Williams *et al.* Impact of streetlight technologies on bats

652 **Supplementary Information References**

- 653 Barlow, KE, Briggs, PA, Haysom, KA, Hutson, AM, Lechiara, NL, Racey, PA, Walsh, AL &  
654 Langton, SD. Citizen science reveals trends in bat populations: The National Bat  
655 Monitoring Programme in Great Britain. *Biol Cons.* 2015;182:14–26.
- 656 Fewster, RM, Buckland, ST, Siriwardena, GM, Baillie, SR and Wilson, JD. Analysis of  
657 population trends for farmland birds using generalised additive models. *Ecology*,  
658 2000;81:1970-1984.
- 659 Jones, KE, Russ, JA, Bashta, AT, Bilhari, Z, Catto, C, Csósz, I, et al. Indicator Bats Program:  
660 A System for the Global Acoustic Monitoring of Bats. In: *Biodiversity Monitoring  
661 and Conservation*. Wiley-Blackwell, New York, 2013, pp. 211–247.
- 662 Wood, S.N. Fast stable restricted maximum likelihood and marginal likelihood estimation of  
663 semiparametric generalized linear models. *J R Stat Soc Series B Stat Methodol.*  
664 2011;73:3-36.
